# Supplementary material for: Alters- und geschlechtsbezogene Verteilung von Zuführung, Ersteinschätzung, Entlassart und Verweildauer in der zentralen Notaufnahme
Source: Springer Nature journal article supplement (doi:10.1007/s10049-021-00895-9), 2021-05-18
Supplement: MOESM1 [file 19173524]

**Zusatzmaterial zum Beitrag „Alters- und Geschlechtsbezogene Verteilung von Zuführung, Ersteinschätzung, Entlassart und Verweildauer in der Zentralen Notaufnahme“ von Michael M., Al Agha S., Böhm L. et al. (2021) in *Notfall+Rettungsmedizin***

Beitrag und Zusatzmaterial stehen Ihnen auf [www.springermedizin.de](http://www.springermedizin.de) zur Verfügung. Bitte geben Sie dort den Beitragstitel in die Suche ein.

### Geschlechtsabhängige Altersverteilung der Notaufnahmepatienten (Alter in Jahren)

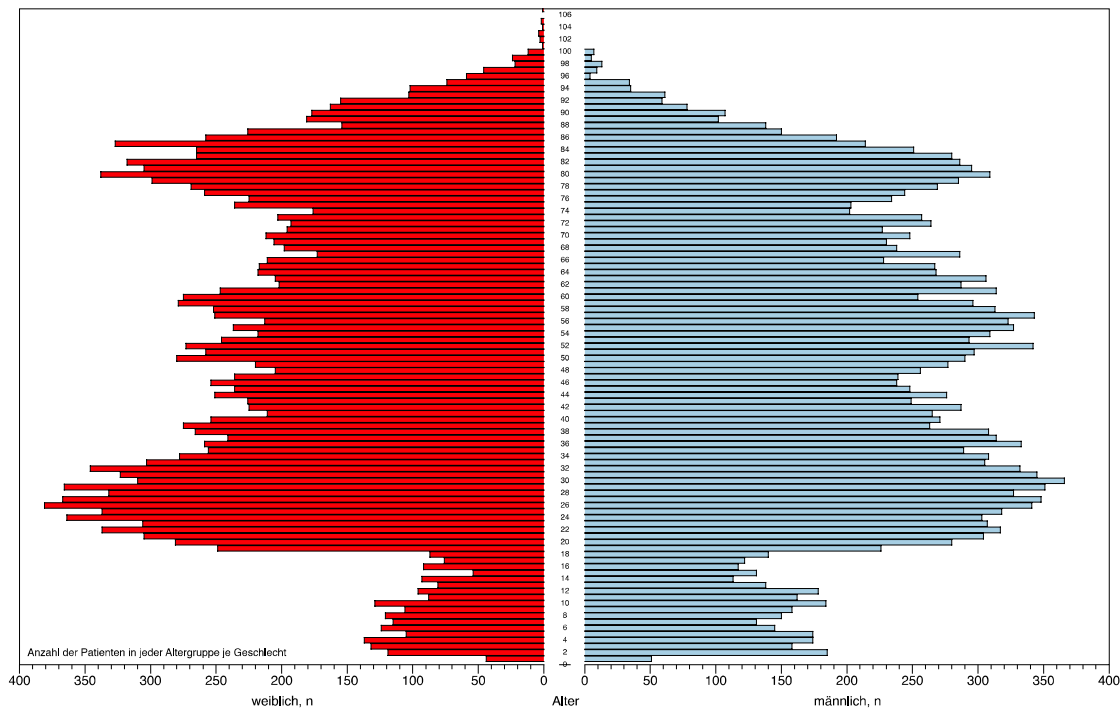

### Verweildauer der Patienten in der Notaufnahme in Abhängigkeit von der Entlassart (ambulant, SAKU = prästationäre Abklärungsuntersuchung, stationäre Aufnahme) in den einzelnen Alterskategorien unter Berücksichtigung des Geschlechts

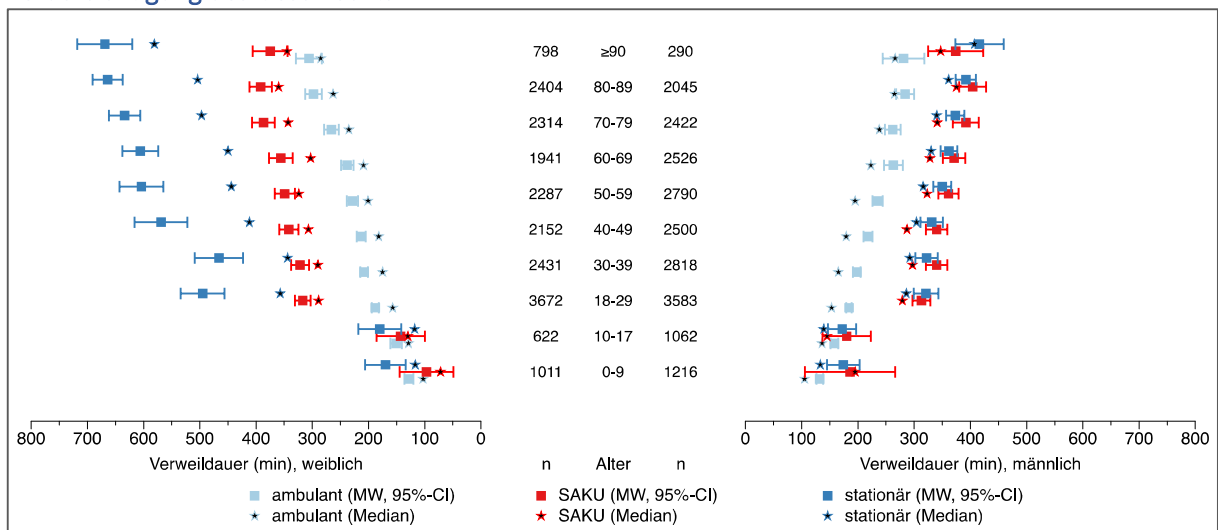

[Mittelwert (MW), 95%-Konfidenzintervall (95%-CI), Median].

Verweildauer der Patienten in der Notaufnahme in Abhängigkeit von der Entlassart (ambulant, SAKU = prästationäre Abklärungsuntersuchung, stationäre Aufnahme) in den einzelnen Alterskategorien unter Berücksichtigung des Geschlechts

|              | w    | ambulant |        |     |        | SAKU |        |     |        | stationär |        |     |        |
|--------------|------|----------|--------|-----|--------|------|--------|-----|--------|-----------|--------|-----|--------|
| Altersgruppe | n    | MW       | 95%-CI |     | Median | MW   | 95%-CI |     | Median | MW        | 95%-CI |     | Median |
| 0-9          | 1216 | 132      | 126    | 237 | 105    | 186  | 106    | 266 | 195    | 174       | 145    | 203 | 133    |
| 10-17        | 1062 | 158      | 151    | 294 | 136    | 180  | 137    | 223 | 145    | 172       | 147    | 197 | 139    |
| 18-29        | 3583 | 184      | 179    | 337 | 153    | 313  | 297    | 329 | 279    | 321       | 299    | 343 | 286    |
| 30-39        | 2818 | 198      | 191    | 363 | 165    | 340  | 321    | 359 | 297    | 322       | 302    | 342 | 292    |
| 40-49        | 2500 | 218      | 210    | 397 | 179    | 340  | 321    | 359 | 287    | 331       | 311    | 351 | 304    |
| 50-59        | 2790 | 235      | 226    | 430 | 195    | 361  | 343    | 379 | 323    | 350       | 334    | 366 | 316    |
| 60-69        | 2526 | 263      | 246    | 486 | 223    | 371  | 351    | 391 | 328    | 362       | 347    | 377 | 330    |
| 70-79        | 2422 | 262      | 248    | 500 | 238    | 392  | 369    | 415 | 341    | 373       | 357    | 389 | 340    |
| 80-89        | 2045 | 284      | 268    | 549 | 265    | 404  | 380    | 428 | 375    | 392       | 374    | 410 | 361    |
| ≥90          | 290  | 281      | 244    | 547 | 266    | 374  | 325    | 423 | 347    | 416       | 373    | 459 | 407    |
|              | m    | ambulant |        |     |        | SAKU |        |     |        | stationär |        |     |        |
| Altersgruppe | n    | MW       | 95%-CI |     | Median | MW   | 95%-CI |     | Median | MW        | 95%-CI |     | Median |
| 0-9          | 1011 | 128      | 120    | 136 | 103    | 97   | 49     | 145 | 72     | 170       | 134    | 206 | 117    |
| 10-17        | 622  | 151      | 141    | 161 | 129    | 143  | 100    | 186 | 130    | 180       | 142    | 218 | 118    |
| 18-29        | 3672 | 188      | 182    | 194 | 157    | 317  | 303    | 331 | 289    | 495       | 456    | 534 | 357    |
| 30-39        | 2431 | 208      | 201    | 215 | 175    | 322  | 306    | 338 | 290    | 466       | 423    | 509 | 344    |
| 40-49        | 2152 | 213      | 205    | 221 | 182    | 342  | 325    | 359 | 307    | 569       | 522    | 616 | 412    |
| 50-59        | 2287 | 229      | 219    | 239 | 201    | 349  | 331    | 367 | 324    | 604       | 565    | 643 | 444    |
| 60-69        | 1941 | 238      | 227    | 249 | 209    | 356  | 335    | 377 | 303    | 606       | 574    | 638 | 450    |
| 70-79        | 2314 | 266      | 253    | 279 | 235    | 387  | 367    | 407 | 343    | 634       | 606    | 662 | 497    |
| 80-89        | 2404 | 298      | 283    | 313 | 263    | 392  | 372    | 412 | 360    | 664       | 637    | 691 | 504    |
| ≥90          | 798  | 306      | 283    | 329 | 285    | 375  | 344    | 406 | 345    | 669       | 620    | 718 | 581    |

[Mittelwert (MW), 95%-Konfidenzintervall (95%-CI), Median, m=männlich, w=weiblich].
